# Supplementary material
Source: PubMed Central journal article supplement (PMC8846369)
Supplement: ehp9307.s001.acco.pdf [file ehp9307.s001.acco.pdf]

**Note to readers with disabilities:** *EHP* strives to ensure that all journal content is accessible to all readers. However, some figures and Supplemental Material published in *EHP* articles may not conform to [508 standards](#) due to the complexity of the information being presented. If you need assistance accessing journal content, please contact [ehp508@niehs.nih.gov](mailto:ehp508@niehs.nih.gov). Our staff will work with you to assess and meet your accessibility needs within 3 working days.

### **Supplemental Material**

#### **Sociodemographic Patterns of Exposure to Civil Aircraft Noise in the United States**

Matthew C. Simon, Jaime E. Hart, Jonathan I. Levy, Trang VoPham, Andrew Malwitz, Daniel Nguyen, Matthew Bozigar, L. Adrienne Cupples, Peter James, Francine Laden, and Junenette L. Peters

#### **Table of Contents**

**Table S1.** Within airport odds ratios for block group exposure to three different day-night average sound level (DNL) thresholds (i.e., three different models) for a 10% increase in percent of block group with characteristic using multivariable hybrid mixed effect logistic model with random intercept by airport and adjustment for distance to airport.

**Table S2.** Multivariable-adjusted odds ratio for block group exposure to day-night average sound level (DNL)  $\geq 45$  dB(A) (86 airports with  $\geq 100$  block groups within the buffer area) for a 10% increase in percent of block group with characteristic, in the main model controlling for all variables with adjustment for airport and in second model additionally adjusting for distance to airport.

**Table S3.** Multivariable-adjusted odds ratio and confidence interval (CI) for block group exposure to day-night average sound level (DNL)  $\geq 55$  dB(A) (61 airports with  $\geq 100$  block groups within the buffer area) for a 10% increase in percent of block group with characteristic, in the main model controlling for all variables with adjustment for airport and in second model additionally adjusting for distance to airport.

**Table S4.** Multivariable-adjusted odds ratio for block group exposure to day-night average sound level (DNL)  $\geq 65$  dB(A) (15 airports with  $\geq 100$  block groups within the buffer area) for a 10% increase in percent of block group with characteristic, in the main model controlling for all variables with adjustment for airport and in a second model additionally adjusting for distance to airport.

**Table S5.** Bayesian approach multivariable-adjusted odds ratio and confidence interval (CI) for block group exposure to day-night average sound level (DNL)  $\geq 45$  dB(A) (61 airports with  $\geq 100$  block groups within the buffer area) for a 10% increase in percent of block group with characteristic, in the main model controlling for all variables with airport random effect and in second model additionally adjusting for distance to airport.

**Table S6.** Bayesian approach multivariable-adjusted odds ratio and confidence interval (CI) for block group exposure to day-night average sound level (DNL)  $\geq 55$  dB(A) (61 airports with  $\geq 100$  block groups within the buffer area) for a 10% increase in percent of block group with characteristic, in the main model controlling for all variables with airport random effect and in second model additionally adjusting for distance to airport.

**Table S7.** Bayesian approach multivariable-adjusted odds ratio and confidence interval (CI) for block group exposure to day-night average sound level (DNL)  $\geq 65$  dB(A) (61 airports with  $\geq 100$  block groups within the buffer area) for a 10% increase in percent of block group with characteristic, in the main model controlling for all variables with airport random effect and in second model additionally adjusting for distance to airport.

**Table S8.** Multivariable-adjusted odds ratio for block group exposure to nighttime average sound level (LAeqN)  $\geq 45$  dB(A) (54 airports with  $\geq 100$  block groups within the buffer area) for a 10% increase in percent of block group with characteristic, in the main model controlling for all variables with adjustment for airport and in a second model additionally adjusting for distance to airport.

**Table S9.** Multivariable-adjusted odds ratio for block group exposure to nighttime average sound level (LAeqN)  $\geq 55$  dB(A) (10 airports with  $\geq 100$  block groups within the buffer area) for a 10% increase in percent of block group with characteristic, in the main model controlling for all variables with adjustment for airport and in a second model additionally adjusting for distance to airport.

**Table S10.** Univariable odds ratio for block group exposure to day-night average sound level (DNL)  $\geq 45$  dB(A) (86 airports with  $\geq 100$  block groups within the buffer area) for a 10% increase in percent of block group with each characteristic. N=74,170 block groups (21,296 exposed).

**Table S11.** Univariable odds ratio for block group exposure to day-night average sound level (DNL)  $\geq 55$  dB(A) (61 airports with  $\geq 100$  block groups within the buffer area) for a 10% increase in percent of block group with each characteristic. N=34,283 block groups (3,476 exposed).

**Table S12.** Univariable odds ratio for block group exposure to day-night average sound level (DNL)  $\geq 65$  dB(A) (15 airports with  $\geq 100$  block groups within the buffer area) for a 10% increase in percent of block group with each characteristic. N=4,031 block groups (158 exposed).

**Table S13.** Univariable odds ratio for block group exposure to nighttime average sound level (LAeqN)  $\geq 45$  dB(A) (54 airports with  $\geq 100$  block groups within the buffer area) for a 10% increase in percent of block group with each characteristic. N=25,970 block groups (1,837 exposed).

**Table S14.** Univariable odds ratio for block group exposure to nighttime average sound level (LAeqN)  $\geq 55$  dB(A) (10 airports with  $\geq 100$  block groups within the buffer area) for a 10% increase in percent of block group with each characteristic. N=2,151 block groups (58 exposed).

**Figure S1.** Mean-difference plots for socially vulnerable groups: A) non-Hispanic Black, B) non-Hispanic Asian, C) Hispanic, D) non-Hispanic Other, E) no high school diploma or GED, F) high school diploma or GED only, G) annual household income  $< \$25,000$ , H) annual household income  $\$25,000$  to  $< \$50,000$ , and I) annual household income  $\$50,000$  to  $< \$75,000$ . In plots A-I, each airport-specific relationship is represented by a point ( $n_{\text{airport}}=86$ ), where the x-axis is the mean of the percent socially vulnerable group for all block groups within the maximum extent and the y-axis is the mean difference between the percent exposed for the socially vulnerable group and the airport mean. Airports above the zero line were those found to have block groups with a *greater* percentage of socially vulnerable groups within the 45-dB(A) noise contour than the mean of all block groups around that airport (i.e., more exposed). Airports below the zero line were those found to have block groups with a *lower* percentage of socially vulnerable groups within the 45-dB(A) noise contour than the mean of all block groups around that airport (i.e., less exposed). Points along the zero line are airports where there is no difference in percent socially vulnerable groups within the DNL 45-dB(A) contour (i.e., exposed) relative to the airport mean. Dashed lines are the mean of the mean differences across all airports.

**Figure S2.** Mean-difference plots for socially vulnerable groups: A) non-Hispanic Black, B) non-Hispanic Asian, C) Hispanic, D) non-Hispanic Other, E) no high school diploma or GED, F) high school diploma or GED only, G) annual household income  $< \$25,000$ , H) annual household income  $\$25,000$  to  $< \$50,000$ , and I) annual household income  $\$50,000$  to  $< \$75,000$ . In plots A-I, each airport-specific relationship is represented by a point ( $n_{\text{airport}}=14$ ), where the x-axis is the mean of the percent socially vulnerable group for all block groups within the maximum extent and the y-axis is the mean difference between the percent exposed for the socially vulnerable group and the airport mean. Airports above the zero line were those found to have block groups with a *greater* percentage of socially vulnerable groups within the 65-dB(A) noise contour than the mean of all block groups around that airport (i.e., more exposed). Airports below the zero line were those found to have block groups with a *lower* percentage of socially vulnerable groups within the 65-dB(A) noise contour than the mean of all block groups around that airport (i.e., less exposed). Points along the zero line are airports where there is no difference in percent socially vulnerable groups within the DNL-65 dB(A) contour (i.e., exposed) relative to the airport mean. Dashed lines are the mean of the mean differences across all airports.

Table S1. Within airport odds ratios for block group exposure to three different day-night average sound level (DNL) thresholds (i.e., three different models) for a 10% increase in percent of block group with characteristic using multivariable hybrid mixed effect logistic model with random intercept by airport and adjustment for distance to airport.

|                              | DNL 45 dB(A) Model<br>(n=86 airports; 74,170<br>block groups;<br>21,296 exposed) | DNL 55 dB(A) Model<br>(n=61 airports; 34,283<br>block groups; 3,476<br>exposed) | DNL 65 dB(A) Model<br>(n=15 airports; 4,031<br>block groups; 158<br>exposed) |
|------------------------------|----------------------------------------------------------------------------------|---------------------------------------------------------------------------------|------------------------------------------------------------------------------|
| Variables                    | Odds Ratio (95% CI)                                                              | Odds Ratio (95% CI)                                                             | Odds Ratio (95% CI)                                                          |
| % Race/Ethnicity             |                                                                                  |                                                                                 |                                                                              |
| Non-Hispanic Black           | 1.01 (1.00, 1.02)                                                                | 0.97 (0.95, 0.99)                                                               | 0.99 (0.90, 1.07)                                                            |
| Non-Hispanic Asian           | 1.09 (1.07, 1.11)                                                                | 1.04 (1.01, 1.08)                                                               | 0.51 (0.34, 0.77)                                                            |
| Hispanic                     | 1.10 (1.09, 1.12)                                                                | 1.00 (0.98, 1.03)                                                               | 1.08 (0.96, 1.23)                                                            |
| Non-Hispanic Other           | 0.98 (0.93, 1.03)                                                                | 0.86 (0.78, 0.94)                                                               | 0.88 (0.57, 1.35)                                                            |
| Non-Hispanic White           | Reference                                                                        | Reference                                                                       | Reference                                                                    |
| % Education                  |                                                                                  |                                                                                 |                                                                              |
| < High school diploma or GED | 1.04 (1.01, 1.06)                                                                | 1.13 (1.08, 1.18)                                                               | 1.10 (0.91, 1.33)                                                            |
| High school diploma or GED   | 1.10 (1.08, 1.12)                                                                | 1.13 (1.09, 1.18)                                                               | 1.15 (0.96, 1.38)                                                            |
| > High school diploma or GED | Reference                                                                        | Reference                                                                       | Reference                                                                    |
| % Household Income           |                                                                                  |                                                                                 |                                                                              |
| <\$25k                       | 0.93 (0.92, 0.95)                                                                | 0.99 (0.95, 1.02)                                                               | 1.01 (0.86, 1.18)                                                            |
| \$25k to <\$50k              | 0.98 (0.96, 1.00)                                                                | 1.01 (0.97, 1.05)                                                               | 1.13 (0.94, 1.34)                                                            |
| \$50k to <\$75k              | 1.00 (0.98, 1.02)                                                                | 1.02 (0.97, 1.07)                                                               | 1.20 (0.97, 1.49)                                                            |
| ≥\$75k                       | Reference                                                                        | Reference                                                                       | Reference                                                                    |

Note: The main model adjusted for variables on race/ethnicity, education, household income, airport, and distance to airport.

Table S2. Multivariable-adjusted odds ratio for block group exposure to day-night average sound level (DNL)  $\geq 45$  dB(A) (86 airports with  $\geq 100$  block groups within the buffer area) for a 10% increase in percent of block group with characteristic, in the main model controlling for all variables with adjustment for airport and in second model additionally adjusting for distance to airport.

| DNL 45 dB(A)<br>(n=74,170 block groups;<br>21,296 exposed) | Main Model          | Main Model + adjustment<br>for distance to airport |
|------------------------------------------------------------|---------------------|----------------------------------------------------|
| Variables                                                  | Odds Ratio (95% CI) | Odds Ratio (95% CI)                                |
| % Race/Ethnicity                                           |                     |                                                    |
| Non-Hispanic Black                                         | 1.04 (1.03, 1.05)   | 1.01 (1.00, 1.02)                                  |
| Non-Hispanic Asian                                         | 1.11 (1.09, 1.12)   | 1.09 (1.07, 1.11)                                  |
| Hispanic                                                   | 1.13 (1.11, 1.14)   | 1.10 (1.09, 1.12)                                  |
| Non-Hispanic Other                                         | 1.09 (1.05, 1.14)   | 0.98 (0.93, 1.03)                                  |
| Non-Hispanic White                                         | Reference           | Reference                                          |
| % Education                                                |                     |                                                    |
| < High school diploma<br>or GED                            | 1.02 (1.00, 1.04)   | 1.04 (1.01, 1.06)                                  |
| High school diploma or<br>GED                              | 1.07 (1.05, 1.09)   | 1.10 (1.08, 1.12)                                  |
| > High school diploma<br>or GED                            | Reference           | Reference                                          |
| % Household Income                                         |                     |                                                    |
| <\$25k                                                     | 1.02 (1.00, 1.03)   | 0.93 (0.92, 0.95)                                  |
| \$25k to <\$50k                                            | 1.06 (1.04, 1.08)   | 0.98 (0.96, 1.00)                                  |
| \$50k to <\$75k                                            | 1.06 (1.04, 1.08)   | 1.00 (0.98, 1.02)                                  |
| $\geq$ \$75k                                               | Reference           | Reference                                          |

Note: The main model adjusted for variables on race/ethnicity, education, household income, and airport.

Table S3. Multivariable-adjusted odds ratio and confidence interval (CI) for block group exposure to day-night average sound level (DNL)  $\geq$  55 dB(A) (61 airports with  $\geq$  100 block groups within the buffer area) for a 10% increase in percent of block group with characteristic, in the main model controlling for all variables with adjustment for airport and in second model additionally adjusting for distance to airport.

| DNL 55 dB(A)<br>(n=34,283 block groups;<br>3,476 exposed) | Main Model          | Main Model + adjustment<br>for distance to airport |
|-----------------------------------------------------------|---------------------|----------------------------------------------------|
| Variables                                                 | Odds Ratio (95% CI) | Odds Ratio (95% CI)                                |
| % Race/Ethnicity                                          |                     |                                                    |
| Non-Hispanic Black                                        | 0.98 (0.97, 1.00)   | 0.97 (0.95, 0.99)                                  |
| Non-Hispanic Asian                                        | 1.04 (1.00, 1.07)   | 1.04 (1.01, 1.08)                                  |
| Hispanic                                                  | 1.05 (1.02, 1.07)   | 1.00 (0.97, 1.03)                                  |
| Non-Hispanic Other                                        | 1.03 (0.94, 1.12)   | 0.85 (0.78, 0.94)                                  |
| Non-Hispanic White                                        | Reference           | Reference                                          |
| % Education                                               |                     |                                                    |
| < High school diploma<br>or GED                           | 1.08 (1.04, 1.13)   | 1.13 (1.08, 1.18)                                  |
| High school diploma or<br>GED                             | 1.21 (1.17, 1.26)   | 1.13 (1.09, 1.18)                                  |
| > High school diploma<br>or GED                           | Reference           | Reference                                          |
| % Household Income                                        |                     |                                                    |
| <\$25k                                                    | 0.96 (0.93, 0.99)   | 0.99 (0.95, 1.02)                                  |
| \$25k to <\$50k                                           | 1.01 (0.97, 1.05)   | 1.01 (0.97, 1.05)                                  |
| \$50k to <\$75k                                           | 1.02 (0.98, 1.07)   | 1.02 (0.97, 1.07)                                  |
| $\geq$ \$75k                                              | Reference           | Reference                                          |

Note: The main model adjusted for variables on race/ethnicity, education, household income, and airport.

Table S4. Multivariable-adjusted odds ratio for block group exposure to day-night average sound level (DNL)  $\geq$  65 dB(A) (15 airports with  $\geq$  100 block groups within the buffer area) for a 10% increase in percent of block group with characteristic, in the main model controlling for all variables with adjustment for airport and in a second model additionally adjusting for distance to airport.

| DNL 65 dB(A)<br>(n=4,031 block groups;<br>158 exposed) | Main Model          | Main Model + adjustment<br>for distance to airport |
|--------------------------------------------------------|---------------------|----------------------------------------------------|
| Variables                                              | Odds Ratio (95% CI) | Odds Ratio (95% CI)                                |
| % Race/Ethnicity                                       |                     |                                                    |
| Non-Hispanic Black                                     | 0.96 (0.89, 1.04)   | 0.99 (0.91, 1.09)                                  |
| Non-Hispanic Asian                                     | 0.44 (0.29, 0.64)   | 0.50 (0.32, 0.74)                                  |
| Hispanic                                               | 1.08 (0.96, 1.23)   | 1.09 (0.96, 1.24)                                  |
| Non-Hispanic Other                                     | 0.83 (0.52, 1.22)   | 0.88 (0.55, 1.32)                                  |
| Non-Hispanic White                                     | Reference           | Reference                                          |
| % Education                                            |                     |                                                    |
| < High school diploma<br>or GED                        | 1.09 (0.90, 1.32)   | 1.08 (0.89, 1.30)                                  |
| High school diploma or<br>GED                          | 1.12 (0.94, 1.34)   | 1.14 (0.95, 1.38)                                  |
| > High school diploma<br>or GED                        | Reference           | Reference                                          |
| % Household Income                                     |                     |                                                    |
| <\$25k                                                 | 0.98 (0.84, 1.15)   | 1.00 (0.85, 1.18)                                  |
| \$25k to <\$50k                                        | 1.09 (0.92, 1.30)   | 1.13 (0.94, 1.35)                                  |
| \$50k to <\$75k                                        | 1.17 (0.95, 1.44)   | 1.20 (0.97, 1.49)                                  |
| $\geq$ \$75k                                           | Reference           | Reference                                          |

Note: The main model adjusted for variables on race/ethnicity, education, household income, and airport.

Table S5. Bayesian approach multivariable-adjusted odds ratio and confidence interval (CI) for block group exposure to day-night average sound level (DNL)  $\geq$  45 dB(A) (61 airports with  $\geq$  100 block groups within the buffer area) for a 10% increase in percent of block group with characteristic, in the main model controlling for all variables with airport random effect and in second model additionally adjusting for distance to airport.

| DNL 45 dB(A)<br>(n=74,170 block groups;<br>21,296 exposed) | Main Model          | Main Model + adjustment<br>for distance to airport |
|------------------------------------------------------------|---------------------|----------------------------------------------------|
| Variables                                                  | Odds Ratio (95% CI) | Odds Ratio (95% CI)                                |
| % Race/Ethnicity                                           |                     |                                                    |
| Non-Hispanic Black                                         | 1.04 (1.03, 1.05)   | 1.01 (1.00, 1.02)                                  |
| Non-Hispanic Asian                                         | 1.11 (1.09, 1.12)   | 1.09 (1.07, 1.11)                                  |
| Hispanic                                                   | 1.13 (1.11, 1.14)   | 1.10 (1.09, 1.12)                                  |
| Non-Hispanic Other                                         | 1.09 (1.05, 1.14)   | 0.98 (0.93, 1.03)                                  |
| Non-Hispanic White                                         | Reference           | Reference                                          |
| % Education                                                |                     |                                                    |
| < High school diploma<br>or GED                            | 1.02 (1.00, 1.04)   | 1.04 (1.01, 1.06)                                  |
| High school diploma or<br>GED                              | 1.07 (1.05, 1.09)   | 1.10 (1.08, 1.12)                                  |
| > High school diploma<br>or GED                            | Reference           | Reference                                          |
| % Household Income                                         |                     |                                                    |
| <\$25k                                                     | 1.02 (1.00, 1.03)   | 0.93 (0.92, 0.95)                                  |
| \$25k to <\$50k                                            | 1.06 (1.04, 1.08)   | 0.98 (0.96, 1.00)                                  |
| \$50k to <\$75k                                            | 1.06 (1.04, 1.08)   | 1.00 (0.98, 1.02)                                  |
| $\geq$ \$75k                                               | Reference           | Reference                                          |

Note: The main model adjusted for variables on race/ethnicity, education, household income, and airport. Specific inputs to the Bayesian models included using four Markov chains, each with 4,000 iterations (including 1,000 burn-in iterations), setting the sampler controls for adapt delta to 0.99 and maximum tree depth to 15, and setting the random number generator seed to '617'.



Table S6. Bayesian approach multivariable-adjusted odds ratio and confidence interval (CI) for block group exposure to day-night average sound level (DNL)  $\geq$  55 dB(A) (61 airports with  $\geq$  100 block groups within the buffer area) for a 10% increase in percent of block group with characteristic, in the main model controlling for all variables with airport random effect and in second model additionally adjusting for distance to airport.

| DNL 55 dB(A)<br>(n=34,283 block groups;<br>3,476 exposed) | Main Model          | Main Model + adjustment<br>for distance to airport |
|-----------------------------------------------------------|---------------------|----------------------------------------------------|
| Variables                                                 | Odds Ratio (95% CI) | Odds Ratio (95% CI)                                |
| % Race/Ethnicity                                          |                     |                                                    |
| Non-Hispanic Black                                        | 0.98 (0.97, 1.00)   | 0.97 (0.95, 0.99)                                  |
| Non-Hispanic Asian                                        | 1.03 (1.00, 1.07)   | 1.04 (1.01, 1.08)                                  |
| Hispanic                                                  | 1.05 (1.02, 1.07)   | 1.00 (0.98, 1.03)                                  |
| Non-Hispanic Other                                        | 1.02 (0.94, 1.11)   | 0.85 (0.78, 0.94)                                  |
| Non-Hispanic White                                        | Reference           | Reference                                          |
| % Education                                               |                     |                                                    |
| < High school diploma<br>or GED                           | 1.09 (1.04, 1.13)   | 1.13 (1.08, 1.18)                                  |
| High school diploma or<br>GED                             | 1.21 (1.17, 1.26)   | 1.13 (1.09, 1.18)                                  |
| > High school diploma<br>or GED                           | Reference           | Reference                                          |
| % Household Income                                        |                     |                                                    |
| <\$25k                                                    | 0.96 (0.93, 0.99)   | 0.98 (0.95, 1.02)                                  |
| \$25k to <\$50k                                           | 1.01 (0.98, 1.05)   | 1.00 (0.97, 1.04)                                  |
| \$50k to <\$75k                                           | 1.02 (0.98, 1.07)   | 1.02 (0.97, 1.07)                                  |
| $\geq$ \$75k                                              | Reference           | Reference                                          |

Note: The main model adjusted for variables on race/ethnicity, education, household income, and airport. Specific inputs to the Bayesian models included using four Markov chains, each with 4,000 iterations (including 1,000 burn-in iterations), setting the sampler controls for adapt delta to 0.99 and maximum tree depth to 15, and setting the random number generator seed to '617'.

Table S7. Bayesian approach multivariable-adjusted odds ratio and confidence interval (CI) for block group exposure to day-night average sound level (DNL)  $\geq$  65 dB(A) (61 airports with  $\geq$  100 block groups within the buffer area) for a 10% increase in percent of block group with characteristic, in the main model controlling for all variables with airport random effect and in second model additionally adjusting for distance to airport.

| DNL 65 dB(A)<br>(n=4,031 block groups;<br>158 exposed) | Main Model          | Main Model + adjustment<br>for distance to airport |
|--------------------------------------------------------|---------------------|----------------------------------------------------|
| Variables                                              | Odds Ratio (95% CI) | Odds Ratio (95% CI)                                |
| % Race/Ethnicity                                       |                     |                                                    |
| Non-Hispanic Black                                     | 0.98 (0.90, 1.06)   | 1.01 (0.93, 1.10)                                  |
| Non-Hispanic Asian                                     | 0.44 (0.29, 0.63)   | 0.48 (0.31, 0.71)                                  |
| Hispanic                                               | 1.08 (0.96, 1.21)   | 1.08 (0.96, 1.22)                                  |
| Non-Hispanic Other                                     | 0.83 (0.52, 1.23)   | 0.88 (0.55, 1.34)                                  |
| Non-Hispanic White                                     | Reference           | Reference                                          |
| % Education                                            |                     |                                                    |
| < High school diploma<br>or GED                        | 1.10 (0.91, 1.33)   | 1.08 (0.90, 1.31)                                  |
| High school diploma or<br>GED                          | 1.10 (0.92, 1.31)   | 1.12 (0.93, 1.34)                                  |
| > High school diploma<br>or GED                        | Reference           | Reference                                          |
| % Household Income                                     |                     |                                                    |
| <\$25k                                                 | 0.96 (0.82, 1.13)   | 1.00 (0.85, 1.17)                                  |
| \$25k to <\$50k                                        | 1.08 (0.91, 1.29)   | 1.12 (0.93, 1.33)                                  |
| \$50k to <\$75k                                        | 1.17 (0.95, 1.43)   | 1.19 (0.96, 1.48)                                  |
| $\geq$ \$75k                                           | Reference           | Reference                                          |

Note: The main model adjusted for variables on race/ethnicity, education, household income, and airport. Specific inputs to the Bayesian models included using four Markov chains, each with 4,000 iterations (including 1,000 burn-in iterations), setting the sampler controls for adapt delta to 0.99 and maximum tree depth to 15, and setting the random number generator seed to '617'.

Table S8. Multivariable-adjusted odds ratio for block group exposure to nighttime average sound level (LAeqN)  $\geq$  45 dB(A) (54 airports with  $\geq$  100 block groups within the buffer area) for a 10% increase in percent of block group with characteristic, in the main model controlling for all variables with adjustment for airport and in a second model additionally adjusting for distance to airport.

| LAeqN 45 dB(A)<br>(n=25,970 block groups;<br>1,837 exposed) | Main Model          | Main Model + adjustment<br>for distance to airport |
|-------------------------------------------------------------|---------------------|----------------------------------------------------|
| Variables                                                   | Odds Ratio (95% CI) | Odds Ratio (95% CI)                                |
| % Race/Ethnicity                                            |                     |                                                    |
| Non-Hispanic Black                                          | 0.98 (0.96, 1.01)   | 0.96 (0.94, 0.99)                                  |
| Non-Hispanic Asian                                          | 0.99 (0.94, 1.03)   | 0.99 (0.94, 1.04)                                  |
| Hispanic                                                    | 1.02 (0.99, 1.06)   | 0.97 (0.93, 1.01)                                  |
| Non-Hispanic Other                                          | 0.92 (0.82, 1.03)   | 0.74 (0.65, 0.83)                                  |
| Non-Hispanic White                                          | Reference           | Reference                                          |
| % Education                                                 |                     |                                                    |
| < High school diploma<br>or GED                             | 1.14 (1.08, 1.20)   | 1.22 (1.16, 1.30)                                  |
| High school diploma or<br>GED                               | 1.27 (1.21, 1.33)   | 1.20 (1.14, 1.26)                                  |
| > High school diploma<br>or GED                             | Reference           | Reference                                          |
| % Household Income                                          |                     |                                                    |
| <\$25k                                                      | 0.96 (0.92, 1.00)   | 1.01 (0.96, 1.05)                                  |
| \$25k to <\$50k                                             | 1.03 (0.98, 1.08)   | 1.04 (0.99, 1.10)                                  |
| \$50k to <\$75k                                             | 1.05 (0.99, 1.11)   | 1.07 (1.00, 1.14)                                  |
| $\geq$ \$75k                                                | Reference           | Reference                                          |

Note: The main model adjusted for variables on race/ethnicity, education, household income, and airport.

Table S9. Multivariable-adjusted odds ratio for block group exposure to nighttime average sound level (LAeqN)  $\geq$  55 dB(A) (10 airports with  $\geq$  100 block groups within the buffer area) for a 10% increase in percent of block group with characteristic, in the main model controlling for all variables with adjustment for airport and in a second model additionally adjusting for distance to airport.

| LAeqN 55(A)<br>(n=2,151 block groups;<br>58 exposed) | Main Model          | Main Model + adjustment<br>for distance to airport |
|------------------------------------------------------|---------------------|----------------------------------------------------|
| Variables                                            | Odds Ratio (95% CI) | Odds Ratio (95% CI)                                |
| % Race/Ethnicity                                     |                     |                                                    |
| Non-Hispanic Black                                   | 1.03 (0.89, 1.20)   | 1.04 (0.89, 1.23)                                  |
| Non-Hispanic Asian                                   | 0.31 (0.10, 0.72)   | 0.35 (0.11, 0.83)                                  |
| Hispanic                                             | 1.26 (1.02, 1.57)   | 1.25 (1.01, 1.58)                                  |
| Non-Hispanic Other                                   | 0.85 (0.36, 1.64)   | 0.87 (0.36, 1.75)                                  |
| Non-Hispanic White                                   | Reference           | Reference                                          |
| % Education                                          |                     |                                                    |
| < High school diploma<br>or GED                      | 1.01 (0.73, 1.39)   | 1.02 (0.74, 1.40)                                  |
| High school diploma or<br>GED                        | 1.16 (0.85, 1.57)   | 1.16 (0.84, 1.60)                                  |
| > High school diploma<br>or GED                      | Reference           | Reference                                          |
| % Household Income                                   |                     |                                                    |
| <\$25k                                               | 0.95 (0.73, 1.25)   | 0.97 (0.74, 1.29)                                  |
| \$25k to <\$50k                                      | 1.11 (0.81, 1.52)   | 1.17 (0.85, 1.61)                                  |
| \$50k to <\$75k                                      | 1.33 (0.95, 1.87)   | 1.42 (1.00, 2.03)                                  |
| $\geq$ \$75k                                         | Reference           | Reference                                          |

Note: The main model adjusted for variables on race/ethnicity, education, household income, and airport.

Table S10. Univariable odds ratio for block group exposure to day-night average sound level (DNL)  $\geq 45$  dB(A) (86 airports with  $\geq 100$  block groups within the buffer area) for a 10% increase in percent of block group with each characteristic. N=74,170 block groups (21,296 exposed).

| Variables                    | Odds Ratio (95% CI) |
|------------------------------|---------------------|
| % Race/Ethnicity             |                     |
| Non-Hispanic Black           | 1.03 (1.02, 1.03)   |
| Non-Hispanic Asian           | 1.04 (1.03, 1.06)   |
| Hispanic                     | 1.08 (1.07, 1.08)   |
| Non-Hispanic Other           | 0.98 (0.94, 1.01)   |
| Non-Hispanic White           | 0.93 (0.93, 0.93)   |
| % Education                  |                     |
| < High school diploma or GED | 1.14 (1.13, 1.15)   |
| High school diploma or GED   | 1.14 (1.13, 1.15)   |
| > High school diploma or GED | 0.90 (0.89, 0.90)   |
| % Household Income           |                     |
| <\$25k                       | 1.05 (1.04, 1.06)   |
| \$25k to <\$50k              | 1.09 (1.07, 1.10)   |
| \$50k to <\$75k              | 1.04 (1.02, 1.06)   |
| $\geq$ \$75k                 | 0.94 (0.93, 0.95)   |
| Proximity                    |                     |
| Distance to airport (km)     | 0.84 (0.83, 0.84)   |

Table S11. Univariable odds ratio for block group exposure to day-night average sound level (DNL)  $\geq 55$  dB(A) (61 airports with  $\geq 100$  block groups within the buffer area) for a 10% increase in percent of block group with each characteristic. N=34,283 block groups (3,476 exposed).

| Variables                    | Odds Ratio (95% CI) |
|------------------------------|---------------------|
| % Race/Ethnicity             |                     |
| Non-Hispanic Black           | 1.00 (0.99, 1.01)   |
| Non-Hispanic Asian           | 0.96 (0.93, 0.99)   |
| Hispanic                     | 1.07 (1.06, 1.09)   |
| Non-Hispanic Other           | 0.92 (0.85, 0.99)   |
| Non-Hispanic White           | 0.96 (0.95, 0.97)   |
| % Education                  |                     |
| < High school diploma or GED | 1.12 (1.10, 1.15)   |
| High school diploma or GED   | 1.20 (1.17, 1.24)   |
| > High school diploma or GED | 0.88 (0.87, 0.90)   |
| % Household Income           |                     |
| <\$25k                       | 1.03 (1.01, 1.05)   |
| \$25k to <\$50k              | 1.12 (1.09, 1.16)   |
| \$50k to <\$75k              | 1.07 (1.03, 1.11)   |
| $\geq$ \$75k                 | 0.93 (0.92, 0.95)   |
| Proximity                    |                     |
| Distance to airport (km)     | 0.77 (0.76, 0.77)   |

Table S12. Univariable odds ratio for block group exposure to day-night average sound level (DNL)  $\geq 65$  dB(A) (15 airports with  $\geq 100$  block groups within the buffer area) for a 10% increase in percent of block group with each characteristic. N=4,031 block groups (158 exposed).

| Variables                    | Odds Ratio (95% CI) |
|------------------------------|---------------------|
| % Race/Ethnicity             |                     |
| Non-Hispanic Black           | 1.04 (1.00, 1.09)   |
| Non-Hispanic Asian           | 0.45 (0.31, 0.61)   |
| Hispanic                     | 1.05 (1.00, 1.11)   |
| Non-Hispanic Other           | 0.81 (0.54, 1.14)   |
| Non-Hispanic White           | 0.96 (0.90, 1.01)   |
| % Education                  |                     |
| < High school diploma or GED | 1.15 (1.03, 1.28)   |
| High school diploma or GED   | 1.15 (1.01, 1.30)   |
| > High school diploma or GED | 0.88 (0.81, 0.95)   |
| % Household Income           |                     |
| <\$25k                       | 0.97 (0.88, 1.07)   |
| \$25k to <\$50k              | 1.11 (0.96, 1.26)   |
| \$50k to <\$75k              | 1.17 (0.98, 1.39)   |
| $\geq$ \$75k                 | 0.95 (0.87, 1.03)   |
| Proximity                    |                     |
| Distance to airport (km)     | 0.58 (0.53, 0.64)   |

Table S13. Univariable odds ratio for block group exposure to nighttime average sound level (L<sub>AeqN</sub>) ≥45 dB(A) (54 airports with ≥100 block groups within the buffer area) for a 10% increase in percent of block group with each characteristic. N=25,970 block groups (1,837 exposed).

| Variables                    | Odds Ratio (95% CI) |
|------------------------------|---------------------|
| % Race/Ethnicity             |                     |
| Non-Hispanic Black           | 1.02 (1.01, 1.04)   |
| Non-Hispanic Asian           | 0.89 (0.86, 0.93)   |
| Hispanic                     | 1.08 (1.06, 1.09)   |
| Non-Hispanic Other           | 0.90 (0.81, 0.99)   |
| Non-Hispanic White           | 0.94 (0.93, 0.96)   |
| % Education                  |                     |
| < High school diploma or GED | 1.16 (1.13, 1.19)   |
| High school diploma or GED   | 1.26 (1.21, 1.30)   |
| > High school diploma or GED | 0.85 (0.83, 0.87)   |
| % Household Income           |                     |
| <\$25k                       | 1.06 (1.03, 1.09)   |
| \$25k to <\$50k              | 1.17 (1.13, 1.22)   |
| \$50k to <\$75k              | 1.09 (1.03, 1.14)   |
| ≥\$75k                       | 0.90 (0.87, 0.92)   |
| Proximity                    |                     |
| Distance to airport (km)     | 0.73 (0.71, 0.74)   |



Table S14. Univariable odds ratio for block group exposure to nighttime average sound level (L<sub>AeqN</sub>) ≥55 dB(A) (10 airports with ≥100 block groups within the buffer area) for a 10% increase in percent of block group with each characteristic. N=2,151 block groups (58 exposed).

| Variables                    | Odds Ratio (95% CI) |
|------------------------------|---------------------|
| % Race/Ethnicity             |                     |
| Non-Hispanic Black           | 1.05 (0.97, 1.13)   |
| Non-Hispanic Asian           | 0.26 (0.10, 0.53)   |
| Hispanic                     | 1.06 (0.97, 1.15)   |
| Non-Hispanic Other           | 0.70 (0.31, 1.25)   |
| Non-Hispanic White           | 0.93 (0.83, 1.03)   |
| % Education                  |                     |
| < High school diploma or GED | 1.19 (0.99, 1.43)   |
| High school diploma or GED   | 1.28 (1.03, 1.58)   |
| > High school diploma or GED | 0.82 (0.71, 0.95)   |
| % Household Income           |                     |
| <\$25k                       | 0.96 (0.80, 1.13)   |
| \$25k to <\$50k              | 1.14 (0.90, 1.45)   |
| \$50k to <\$75k              | 1.39 (1.05, 1.83)   |
| ≥\$75k                       | 0.91 (0.78, 1.05)   |
| Proximity                    |                     |
| Distance to airport (km)     | 0.58 (0.49, 0.69)   |

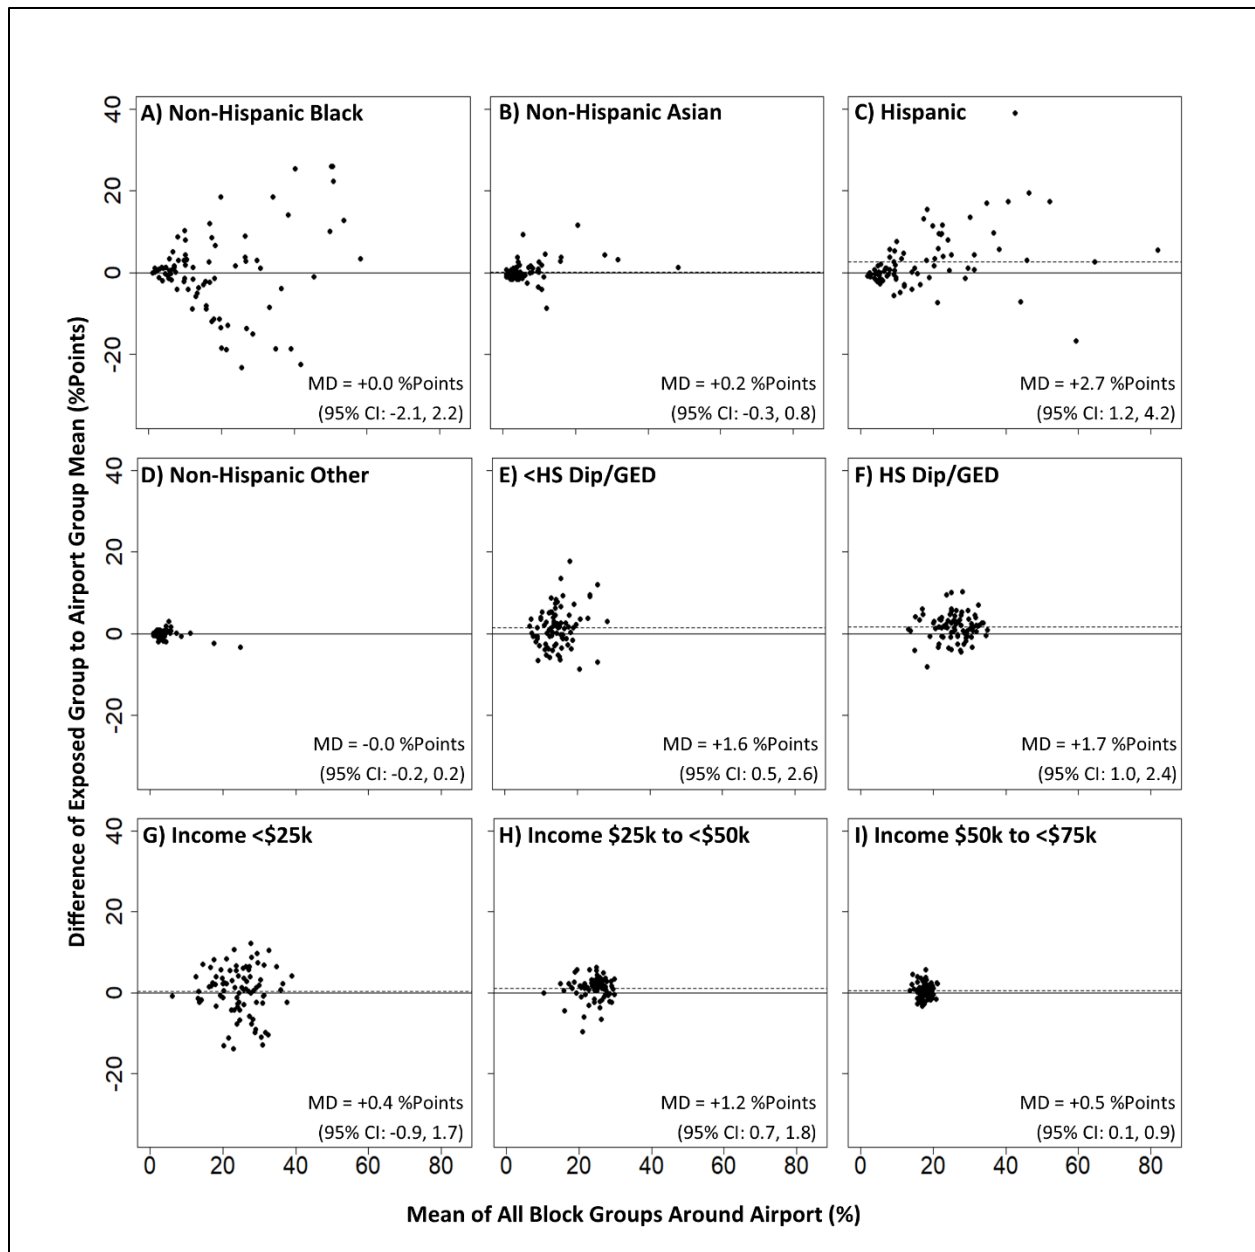

Figure S1. Mean-difference plots for socially vulnerable groups: A) non-Hispanic Black, B) non-Hispanic Asian, C) Hispanic, D) non-Hispanic Other, E) no high school diploma or GED, F) high school diploma or GED only, G) annual household income <\$25,000, H) annual household income \$25,000 to <\$50,000, and I) annual household income \$50,000 to <\$75,000. In plots A-I, each airport-specific relationship is represented by a point ( $n_{\text{airport}}=86$ ), where the x-axis is the mean of the percent socially vulnerable group for all block groups within the maximum extent and the y-axis is the mean difference between the

percent exposed for the socially vulnerable group and the airport mean. Airports above the zero line were those found to have block groups with a *greater* percentage of socially vulnerable groups within the 45-dB(A) noise contour than the mean of all block groups around that airport (i.e., more exposed). Airports below the zero line were those found to have block groups with a *lower* percentage of socially vulnerable groups within the 45-dB(A) noise contour than the mean of all block groups around that airport (i.e., less exposed). Points along the zero line are airports where there is no difference in percent socially vulnerable groups within the DNL 45-dB(A) contour (i.e., exposed) relative to the airport mean. Dashed lines are the mean of the mean differences across all airports.

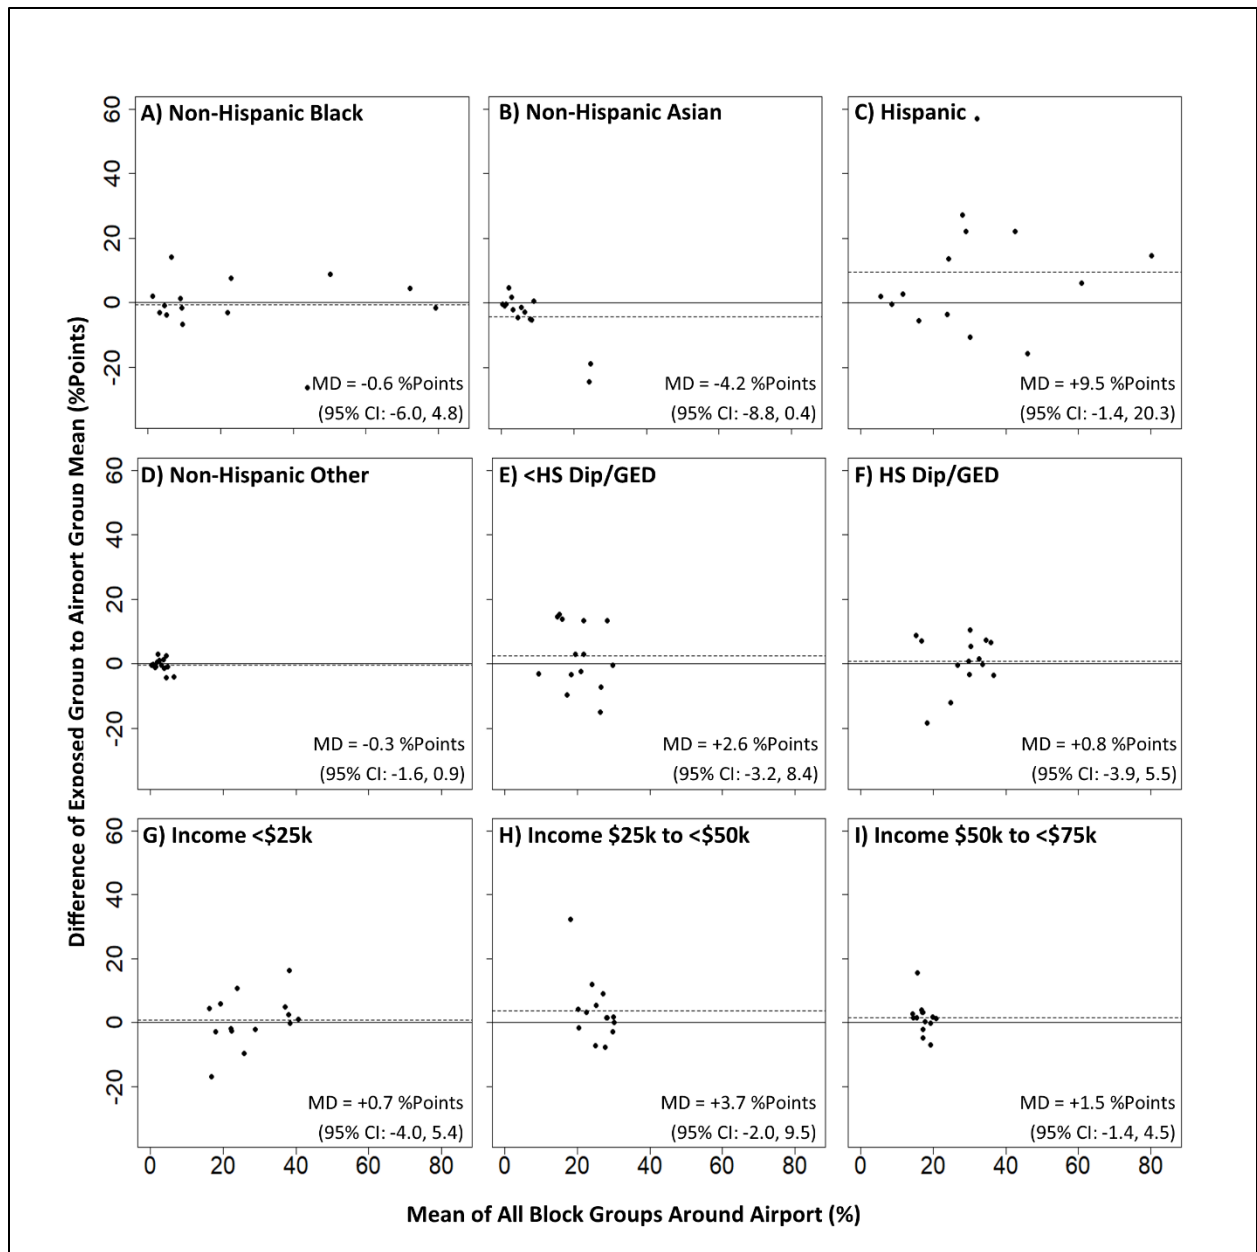

Figure S2. Mean-difference plots for socially vulnerable groups: A) non-Hispanic Black, B) non-Hispanic Asian, C) Hispanic, D) non-Hispanic Other, E) no high school diploma or GED, F) high school diploma or GED only, G) annual household income <\$25,000, H) annual household income \$25,000 to <\$50,000, and I) annual household income \$50,000 to <\$75,000. In plots A-I, each airport-specific relationship is represented by a point ( $n_{\text{airport}}=14$ ), where the x-axis is the mean of the percent socially vulnerable group for all block groups within the maximum extent and the y-axis is the mean difference between the

percent exposed for the socially vulnerable group and the airport mean. Airports above the zero line were those found to have block groups with a *greater* percentage of socially vulnerable groups within the 65-dB(A) noise contour than the mean of all block groups around that airport (i.e., more exposed). Airports below the zero line were those found to have block groups with a *lower* percentage of socially vulnerable groups within the 65-dB(A) noise contour than the mean of all block groups around that airport (i.e., less exposed). Points along the zero line are airports where there is no difference in percent socially vulnerable groups within the DNL-65 dB(A) contour (i.e., exposed) relative to the airport mean. Dashed lines are the mean of the mean differences across all airports.
